# Supplementary material for: Significance of cyclin D1 overexpression in progression and radio-resistance of pediatric ependymomas
Source: PubMed Central journal article supplement (PMC5788657; doi:10.18632/oncotarget.23509), 2017-12-20
Supplement: oncotarget-09-2527-s001.pdf [file oncotarget-09-2527-s001.pdf]

# Significance of cyclin D1 overexpression in progression and radio-resistance of pediatric ependymomas

## SUPPLEMENTARY METARIALS

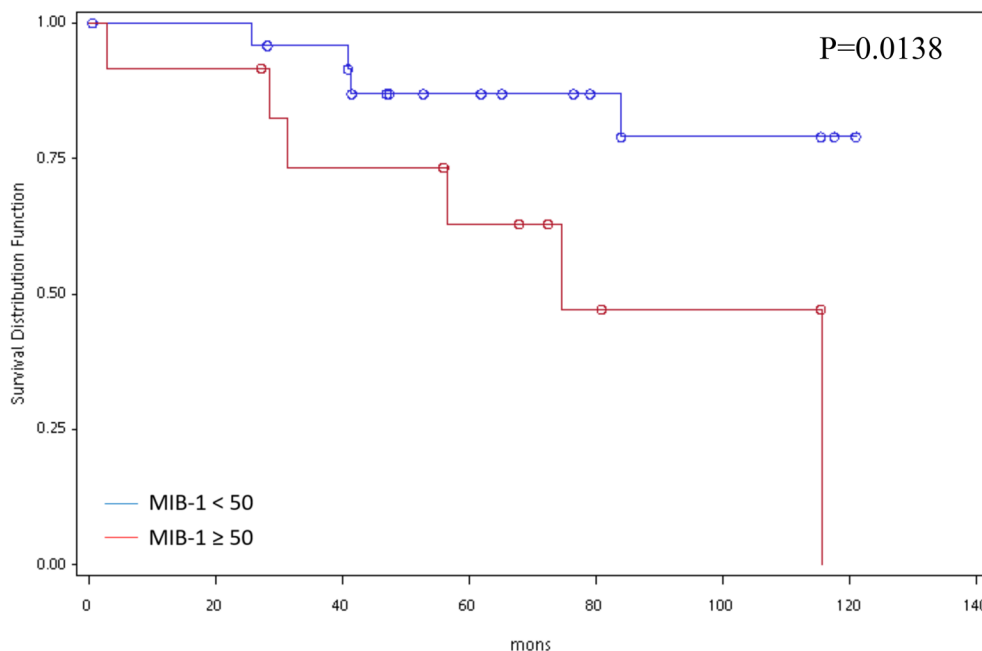

Supplementary Figure 1: The 5 years OS survival for MIB-1 index more or equal to 50 vs. less than 50 were 49% vs 79% ( $P=0.0138$ ).

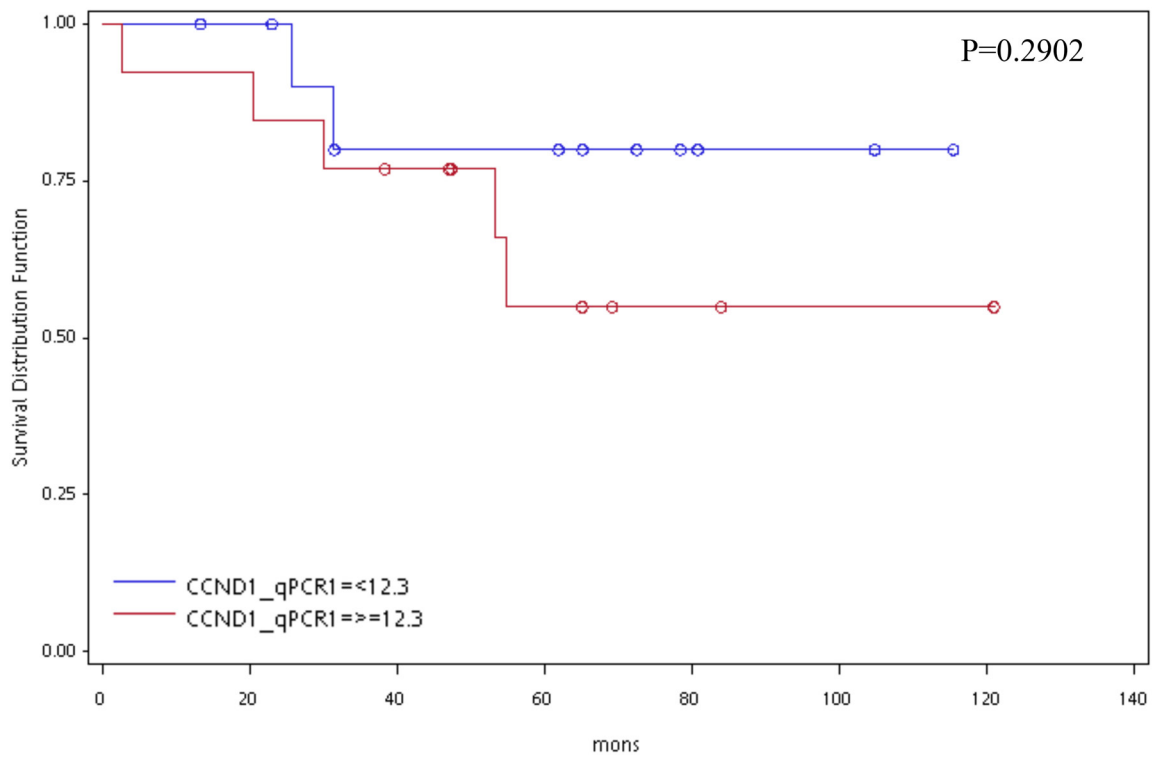

Supplementary Figure 2: The 10 years OS survival for CCND1 expression more or equal to 12.3 (median of qPCR results) vs. less than 12.3. ( $P=0.2902$ ).

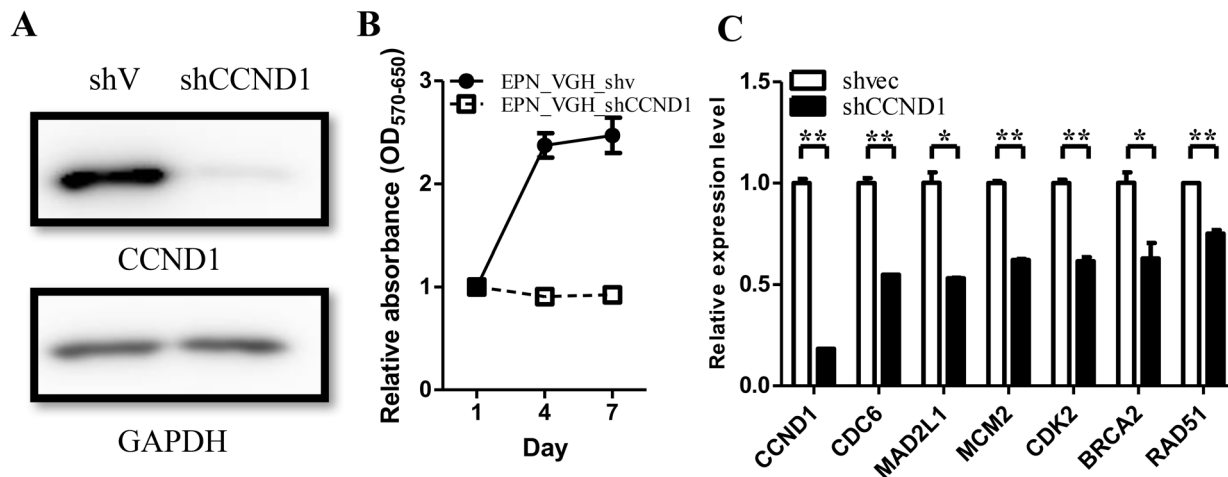

**Supplementary Figure 3:** (A) Knocking down CCND1 (shCCND1) expression in ependymoma cells, EPN\_VGH, which was confirmed through qRT-PCR and immunoblotting. (B) Knocking down CCND1 expression decreased cell proliferation rate in EPN\_VGH cells as measured by MTT assay. (C) Significant suppression of downstream genes was validated by qRT-PCR. qRT-PCR results are presented as mean±SD for duplicate samples. \*\**p*<0.01 by t-test.
